# Supplementary material for: Glycaemia and ischaemia-reperfusion brain injury in patients with ischaemic stroke treated with mechanical thrombectomy (GLIAS-MT): an observational, unicentric, prospective study protocol
Source: PubMed Central journal article supplement (PMC11404171; doi:10.1136/bmjopen-2024-086745), 2024-08-07
Supplement: bmjopen-14-8-s001.pdf [file bmjopen-14-8-s001.pdf]

**Supplemental Table 1. Treatment protocol for hyperglycaemia (>155 mg/dL)**

| During the first 24 hours: insulin should be administered via pump infusion, 100 International Unit (IU) of insulin in 100 ml of 0.9% saline, and the infusion rate adjusted according to the patient's hourly capillary glucose levels. | Intravenous (IV) insulin infusion regimen |                |
|------------------------------------------------------------------------------------------------------------------------------------------------------------------------------------------------------------------------------------------|-------------------------------------------|----------------|
|                                                                                                                                                                                                                                          | Capillary glucose levels (mg/dL)          | Insulin (IU/h) |
| <ul style="list-style-type: none"><li>• If glucose levels above target &gt;2 hours, increase infusion rate by 1IU/hour.</li></ul>                                                                                                        | 155-179                                   | 1              |
| <ul style="list-style-type: none"><li>• If glucose levels &gt;270mg/dL over 2 hours, increase infusion rate by 2IU/hour.</li></ul>                                                                                                       | 180-209                                   | 1,5            |
| <ul style="list-style-type: none"><li>• If glucose levels &gt;360mg/dL over 2 hours, increase infusion rate by 3 IU/hour.</li></ul>                                                                                                      | 210-239                                   | 2              |
| The capillary blood glucose level should be monitored every hour until it remains within the target range for a period of four hours. Thereafter, the monitoring should be conducted every two hours.                                    | 240-269                                   | 3              |
|                                                                                                                                                                                                                                          | 270-299                                   | 4              |
|                                                                                                                                                                                                                                          | 300-329                                   | 5              |
|                                                                                                                                                                                                                                          | 330-359                                   | 6              |
|                                                                                                                                                                                                                                          | >360                                      | 7              |

Following a period of 24 hours and the initiation of oral/enteral nutrition:

1. If no iv insulin required during first 24 hours:
  - Recent diagnosis of DM or a previous diagnosis of DM with antidiabetic drugs: 0.2 units of insulin glargine per kilogram of body weight per day, with rapid-acting insulin corrections.
  - Previous diagnosis of DM with insulin therapy: 0.3-0.4 units of insulin glargine, with subsequent rapid-acting insulin corrections.
2. If iv insulin required during first 24 hours:
  - Calculation of the total insulin dose with requirements during the previous 24 hours: 80% of the iv dose if requirements were  $\leq$  2IU/h, 50% if requirements were  $>$  2IU/h.
  - Overlap of iv insulin and subcutaneous (sc) insulin: maintain iv infusion until 2h after the first administration of rapid insulin sc or 4h if the insulin administered is long-acting.
  - Insulin dose distribution: 50% basal insulin at 09am. 50% rapid-acting insulin divided into 4 doses at breakfast (20%), lunch (40%), snack (10%) and dinner (30%). Correction schedule with same analogue.
